# Supplementary figures and images for: Curcumin Reverses 5-Fluorouracil Resistance by Promoting Human Colon Cancer HCT-8/5-FU Cell Apoptosis and Down-regulating Heat Shock Protein 27 and P-Glycoprotein
Source: Springer Nature journal article supplement (doi:10.1007/s11655-018-2997-z), 2018-11-27

## Appendix 1A

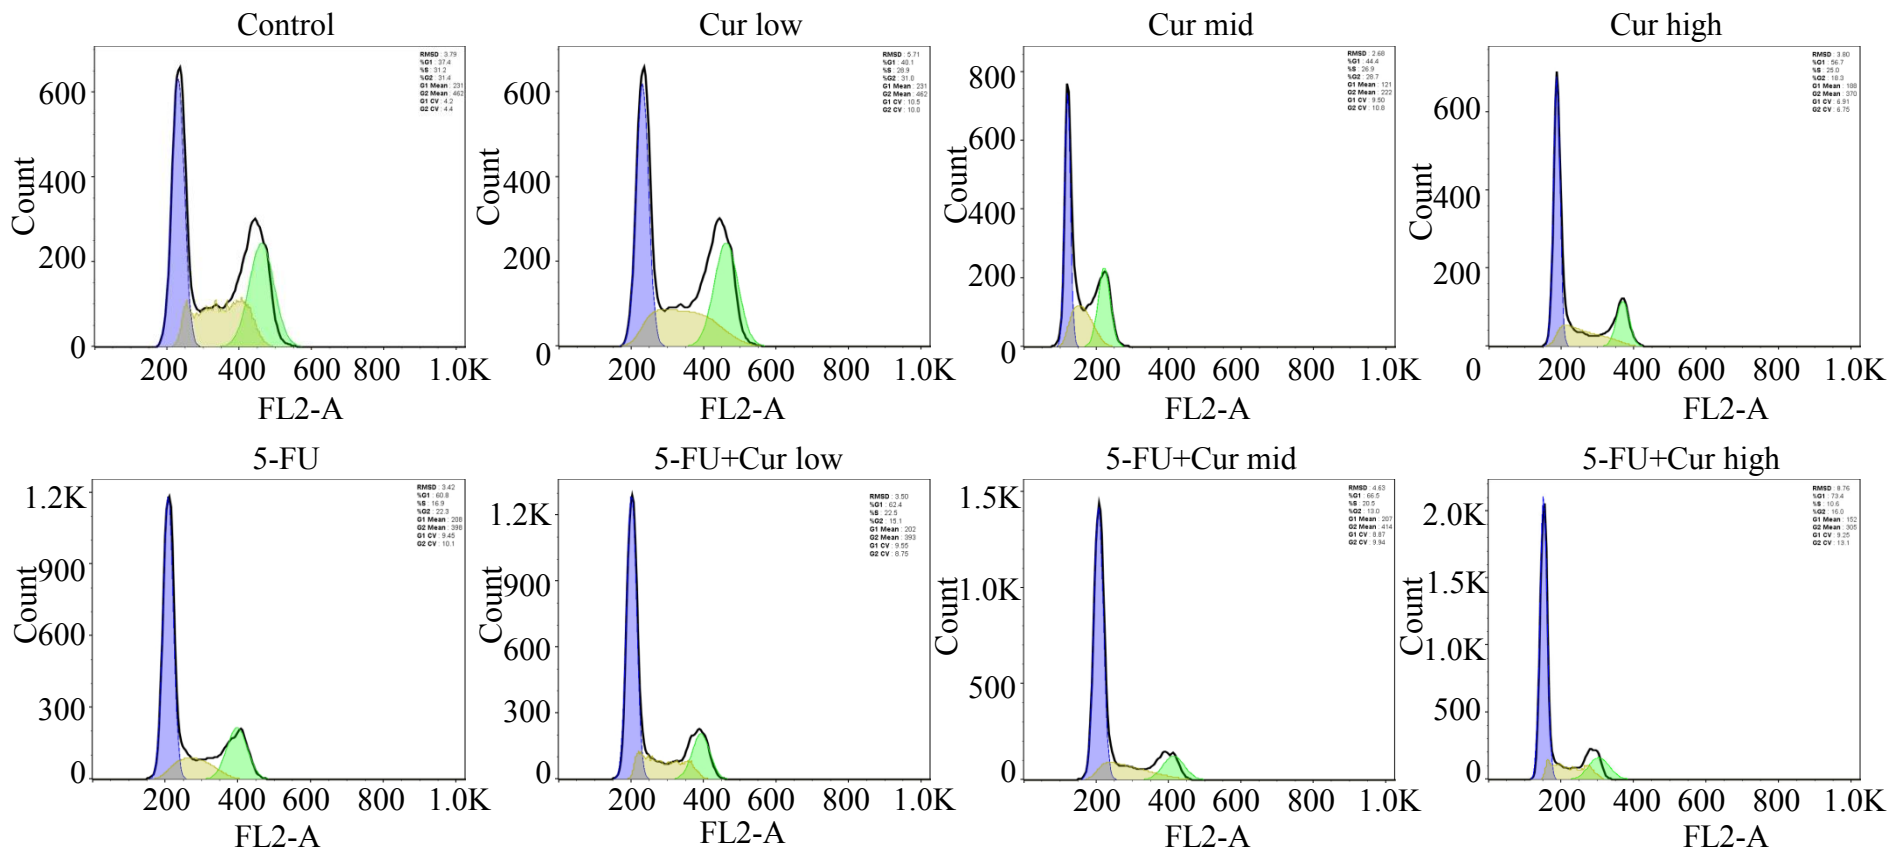

## Appendix 1B

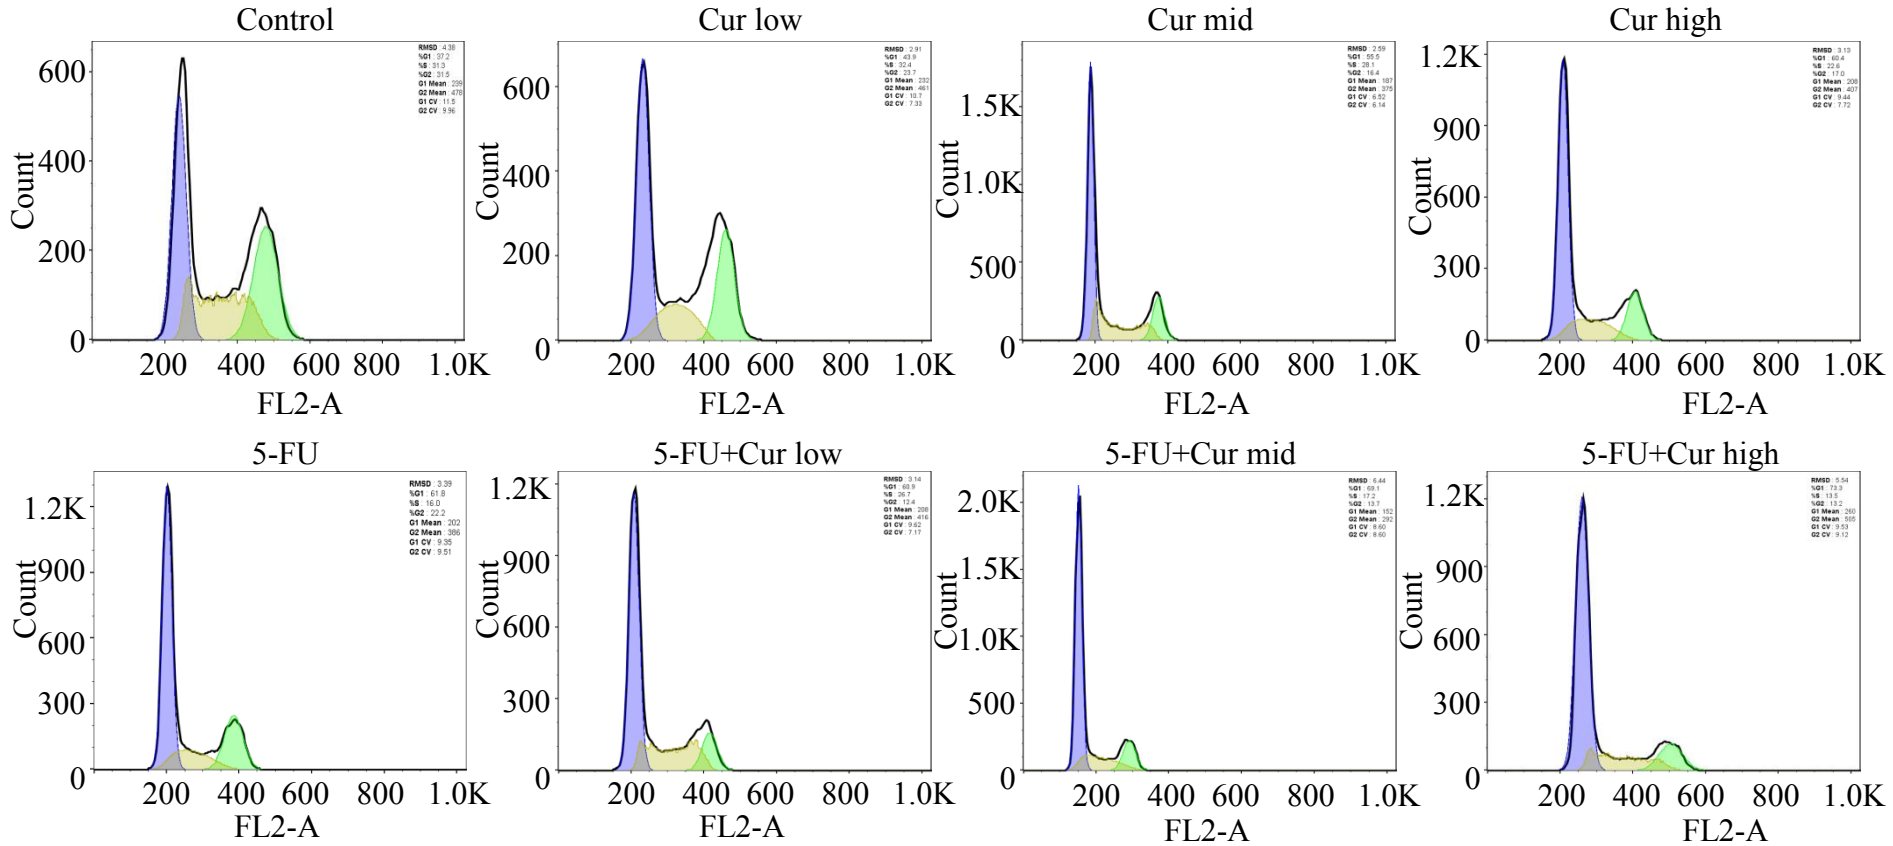

## Appendix 2A

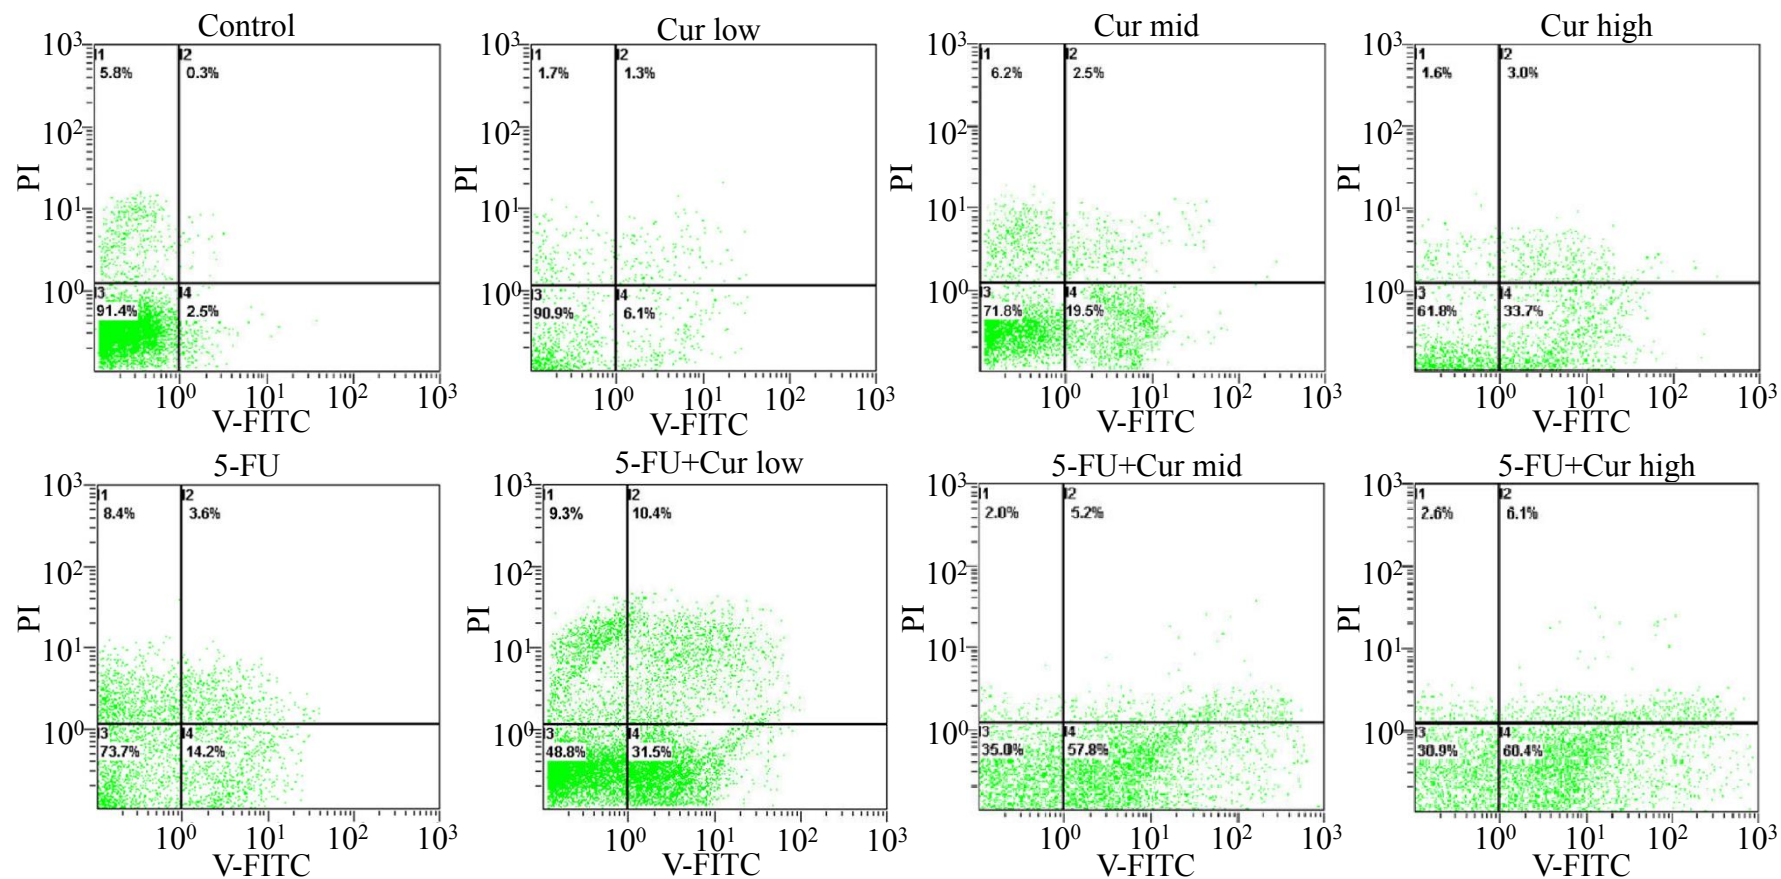

## Appendix 2B



Supplement: 11655_2018_2997_MOESM1_ESM.pdf [file 11655_2018_2997_MOESM1_ESM.pdf]
